# Supplementary material
Source: HighWire-hosted journal article supplement (https://ebmh.bmj.com/content/24/2/82)
Supplement: inline-supplementary-material-2 [file inline-supplementary-material-2.pdf]

**Supplementary material for:****Common infections, mental health problems, and healthcare use in people with inflammatory bowel disease (IBD): A cohort study protocol****Authors:** Peter Irving, Kevin Barrett, Daniel Tang, Monica Nijher, Simon de Lusignan[Additional file 2](#)

Algorithms and codes used to identify anxiety episodes, depression episodes, and recurrent major depression.

**Table S2.1. Algorithms used to identify anxiety episodes, depression episodes, and recurrent major depression.** Expressions in capitals equate to Boolean expressions. \*More than 1 year ago. SSRIs = selective serotonin reuptake inhibitors, TCA = tricyclic antidepressants, MAOI = monoamine oxidase inhibitors, CBT = cognitive behavioural therapy.

| Clinical entity                      | ICD 10 code | Definition                                                                                                                         |
|--------------------------------------|-------------|------------------------------------------------------------------------------------------------------------------------------------|
| <b>Anxiety</b>                       | F41         | Any coded anxiety episode AND concurrent treatment for anxiety                                                                     |
| <b>Depressive episode</b>            | F32         | Any coded depressive episode AND concurrent treatment for depression                                                               |
| <b>Recurrent depressive disorder</b> | F33         | (Any historical code* for a depressive episode AND current treatment for depression) OR Any code for recurrent depressive disorder |
| <b>Anxiety treatments</b>            | NA          | SSRIs, anxiolytics, counselling, CBT, and psychotherapy                                                                            |
| <b>Depression treatments</b>         | NA          | SSRIs, TCAs, MAOIs, counselling, CBT, and psychotherapy                                                                            |

**Table S2.2 Read codes used to identify anxiety episodes**

| <b>Read V2 Code</b>   | <b>Term ID</b> | <b>Description</b>                              |
|-----------------------|----------------|-------------------------------------------------|
| E200.                 | All            | Anxiety states                                  |
| E2000                 | All            | Anxiety state unspecified                       |
| E2001                 | All            | Panic disorder                                  |
| E2002                 | All            | Generalised anxiety disorder                    |
| E2003                 | All            | Anxiety with depression                         |
| E2004                 | All            | Chronic anxiety                                 |
| E2005                 | All            | Recurrent anxiety                               |
| E200z                 | All            | Anxiety state NOS                               |
| Eu41.                 | All            | [X]Other anxiety disorders                      |
| Eu410                 | All            | [X]Panic disorder [episodic paroxysmal anxiety] |
| Eu411                 | All            | [X]Generalized anxiety disorder                 |
| Eu412                 | All            | [X]Mixed anxiety and depressive disorder        |
| Eu413                 | All            | [X]Other mixed anxiety disorders                |
| Eu41y                 | All            | [X]Other specified anxiety disorders            |
| Eu41z                 | All            | [X]Anxiety disorder, unspecified                |
| <b>Read CTV3 Code</b> | <b>Term ID</b> | <b>Description</b>                              |
| E200.                 | All            | Anxiety disorder                                |
| XE1Y7                 | All            | Panic disorder                                  |
| Eu410                 | All            | [X]Panic disorder [episodic paroxysmal anxiety] |
| E2002                 | All            | Generalised anxiety disorder                    |
| X00Sb                 | All            | Mixed anxiety and depressive disorder           |
| X00RP                 | All            | Organic anxiety disorder                        |
| E2004                 | All            | Chronic anxiety                                 |
| E2005                 | All            | Recurrent anxiety                               |
| E200z                 | All            | Anxiety state NOS                               |
| X00Sc                 | All            | Anxiety hysteria                                |
| Eu41.                 | All            | [X]Other anxiety disorders                      |
| Eu413                 | All            | [X]Other mixed anxiety disorders                |
| Eu41z                 | All            | [X]Anxiety disorder, unspecified                |
| XE1Zj                 | All            | [X]Other specified anxiety disorders            |

**Table S2.3 Read codes used to identify depression episodes.**

| Read V2 Code | Term ID | Description                                                               |
|--------------|---------|---------------------------------------------------------------------------|
| E0013        | All     | Presenile dementia with depression                                        |
| E0021        | All     | Senile dementia with depression                                           |
| E112.        | All     | Single major depressive episode                                           |
| E1120        | All     | Single major depressive episode, unspecified                              |
| E1121        | All     | Single major depressive episode, mild                                     |
| E1122        | All     | Single major depressive episode, moderate                                 |
| E1123        | All     | Single major depressive episode, severe, without mention of psychosis     |
| E1124        | All     | Single major depressive episode, severe, with psychosis                   |
| E1125        | All     | Single major depressive episode, in partial or unspecified remission      |
| E1126        | All     | Single major depressive episode, in full remission                        |
| E112z        | All     | Single major depressive episode NOS                                       |
| E113.        | All     | Recurrent major depressive episode                                        |
| E1130        | All     | Recurrent major depressive episodes, unspecified                          |
| E1131        | All     | Recurrent major depressive episodes, mild                                 |
| E1132        | All     | Recurrent major depressive episodes, moderate                             |
| E1133        | All     | Recurrent major depressive episodes, severe, without mention of psychosis |
| E1134        | All     | Recurrent major depressive episodes, severe, with psychosis               |
| E1137        | All     | Recurrent depression                                                      |
| E113z        | All     | Recurrent major depressive episode NOS                                    |
| E118.        | All     | Seasonal affective disorder                                               |
| E11y2        | All     | Atypical depressive disorder                                              |
| E11z2        | All     | Masked depression                                                         |
| E130.        | All     | Reactive depressive psychosis                                             |
| E135.        | All     | Agitated depression                                                       |
| E2003        | All     | Anxiety with depression                                                   |
| E291.        | All     | Prolonged depressive reaction                                             |
| E2B..        | All     | Depressive disorder NEC                                                   |
| E2B1.        | All     | Chronic depression                                                        |
| E2B0.        | All     | Postviral depression                                                      |
| Eu204        | All     | [X]Post-schizophrenic depression                                          |
| Eu251        | All     | [X]Schizoaffective disorder, depressive type                              |
| Eu32.        | All     | [X]Depressive episode                                                     |
| Eu320        | All     | [X]Mild depressive episode                                                |

|                  |                |                                                                                     |
|------------------|----------------|-------------------------------------------------------------------------------------|
| Eu321            | All            | [X]Moderate depressive episode                                                      |
| Eu322            | All            | [X]Severe depressive episode without psychotic symptoms                             |
| Eu323            | All            | [X]Severe depressive episode with psychotic symptoms                                |
| Eu324            | All            | [X]Mild depression                                                                  |
| Eu325            | All            | [X]Major depression, mild                                                           |
| Eu326            | All            | [X]Major depression, moderately severe                                              |
| Eu327            | All            | [X]Major depression, severe without psychotic symptoms                              |
| Eu328            | All            | [X]Major depression, severe with psychotic symptoms                                 |
| Eu32y            | All            | [X]Other depressive episodes                                                        |
| Eu32z            | All            | [X]Depressive episode, unspecified                                                  |
| Eu33.            | All            | [X]Recurrent depressive disorder                                                    |
| Eu330            | All            | [X]Recurrent depressive disorder, current episode mild                              |
| Eu331            | All            | [X]Recurrent depressive disorder, current episode moderate                          |
| Eu332            | All            | [X]Recurrent depressive disorder, current episode severe without psychotic symptoms |
| Eu333            | All            | [X]Recurrent depressive disorder, current episode severe with psychotic symptoms    |
| Eu334            | All            | [X]Recurrent depressive disorder, currently in remission                            |
| Eu33y            | All            | [X]Other recurrent depressive disorders                                             |
| Eu33z            | All            | [X]Recurrent depressive disorder, unspecified                                       |
| Eu412            | All            | [X]Mixed anxiety and depressive disorder                                            |
| <b>Read Code</b> | <b>CTV3</b>    |                                                                                     |
|                  | <b>Term ID</b> | <b>Description</b>                                                                  |
| X00Sb            | All            | Mixed anxiety and depressive disorder                                               |
| X00SO            | All            | Depressive disorder                                                                 |
| X761L            | All            | Seasonal affective disorder                                                         |
| Xa0wV            | All            | Recurrent brief depressive disorder                                                 |
| X00SQ            | All            | Agitated depression                                                                 |
| XE1YC            | All            | Reactive depression                                                                 |
| X00SR            | All            | Endogenous depression                                                               |
| X00SS            | All            | Endogenous depression first episode                                                 |
| XE1Y0            | All            | Single major depressive episode                                                     |
| E1120            | All            | Single major depressive episode, unspecified                                        |
| E1120            | All            | Single major depressive episode, unspecified                                        |
| E1121            | All            | Single major depressive episode, mild                                               |
| E1122            | All            | Single major depressive episode, moderate                                           |
| E1123            | All            | Single major depressive episode, severe, without mention of psychosis               |
| E1124            | All            | Single major depressive episode, severe, with psychosis                             |
| XaX53            | All            | Single major depressive episode, severe, with psychosis, psychosis in remission     |
| E1125            | All            | Single major depressive episode, in partial or unspecified remission                |
| E1126            | All            | Single major depressive episode, in full remission                                  |
| E112z            | All            | Single major depressive episode NOS                                                 |
| XM1GC            | All            | Endogenous depression - recurrent                                                   |
| E1130            | All            | Recurrent major depressive episodes, unspecified                                    |

|        |     |                                                                                     |
|--------|-----|-------------------------------------------------------------------------------------|
| E1131  | All | Recurrent major depressive episodes, mild                                           |
| E1132  | All | Recurrent major depressive episodes, moderate                                       |
| E1133  | All | Recurrent major depressive episodes, severe, without mention of psychosis           |
| E1134  | All | Recurrent major depressive episodes, severe, with psychosis                         |
| E1135  | All | Recurrent major depressive episodes, in partial or unspecified remission            |
| E1136  | All | Recurrent major depressive episodes, in full remission                              |
| E113z  | All | Recurrent major depressive episode NOS                                              |
| X00SU  | All | Masked depression                                                                   |
| E11y2  | All | Atypical depressive disorder                                                        |
| X00S8  | All | Post-schizophrenic depression                                                       |
| XSEGI  | All | Major depressive disorder                                                           |
| XSKr7  | All | Cotard syndrome                                                                     |
| XSGol  | All | Moderate major depression                                                           |
| XSGok  | All | Mild major depression                                                               |
| XSGom  | All | Severe major depression without psychotic features                                  |
| XSGon  | All | Severe major depression with psychotic features                                     |
| E1137  | All | Recurrent depression                                                                |
| E130.  | All | Reactive depressive psychosis                                                       |
| E2B..  | All | Depressive disorder NEC                                                             |
| E2B0.  | All | Postviral depression                                                                |
| E2B1.  | All | Chronic depression                                                                  |
| Eu320  | All | [X]Mild depressive episode                                                          |
| Eu321  | All | [X]Moderate depressive episode                                                      |
| Eu331  | All | [X]Recurrent depressive disorder, current episode moderate                          |
| XE1Y1  | All | Recurrent major depressive episodes                                                 |
| XE1ZY  | All | [X]Severe depressive episode without psychotic symptoms                             |
| XE1ZZ  | All | [X]Severe depressive episode with psychotic symptoms                                |
| XE1Za  | All | [X]Other depressive episodes                                                        |
| XE1Zb  | All | [X]Depressive episode, unspecified                                                  |
| XE1Zd  | All | [X]Recurrent depressive disorder, current episode severe without psychotic symptoms |
| XE1Ze  | All | [X]Recurrent depressive disorder, current episode severe with psychotic symptoms    |
| XE1Zf  | All | [X]Recurrent depressive disorder, unspecified                                       |
| XaB9J  | All | Depression NOS                                                                      |
| XaCHr  | All | [X] Single episode agitated depression without psychotic symptoms                   |
| XaCHs  | All | [X] Single episode major depression without psychotic symptoms                      |
| XaCIs  | All | Mild depression                                                                     |
| XaCIIt | All | Moderate depression                                                                 |
| XaClu  | All | Severe depression                                                                   |
| E0013  | All | Presenile dementia with depression                                                  |
| E0021  | All | Senile dementia with depression                                                     |

**Table S2.4 Read codes used to identify a diagnosis of recurrent major depression.**

| Read V2 Code | Term ID | Description                                                                            |
|--------------|---------|----------------------------------------------------------------------------------------|
| E113.        | All     | Recurrent major depressive episode                                                     |
| E1130        | All     | Recurrent major depressive episodes, unspecified                                       |
| E1131        | All     | Recurrent major depressive episodes, mild                                              |
| E1132        | All     | Recurrent major depressive episodes, moderate                                          |
| E1133        | All     | Recurrent major depressive episodes, severe, without mention of psychosis              |
| E1134        | All     | Recurrent major depressive episodes, severe, with psychosis                            |
| E1135        | All     | Recurrent major depressive episodes, in partial or unspecified remission               |
| E1136        | All     | Recurrent major depressive episodes, in full remission                                 |
| E1137        | All     | Recurrent depression                                                                   |
| E113z        | All     | Recurrent major depressive episode NOS                                                 |
| E2B1.        | All     | Chronic depression                                                                     |
| Eu32A        | All     | [X]Recurrent major depressive episodes, severe, with psychosis, psychosis in remission |
| Eu33.        | All     | [X]Recurrent depressive disorder                                                       |
| Eu330        | All     | [X]Recurrent depressive disorder, current episode mild                                 |
| Eu331        | All     | [X]Recurrent depressive disorder, current episode moderate                             |
| Eu332        | All     | [X]Recurrent depressive disorder, current episode severe without psychotic symptoms    |
| Eu333        | All     | [X]Recurrent depressive disorder, current episode severe with psychotic symptoms       |
| Eu334        | All     | [X]Recurrent depressive disorder, currently in remission                               |
| Eu33y        | All     | [X]Other recurrent depressive disorders                                                |
| Eu33z        | All     | [X]Recurrent depressive disorder, unspecified                                          |
| Read Code    | CTV3    | Term ID                                                                                |
|              |         | Description                                                                            |
| Xa0wV        | All     | Recurrent brief depressive disorder                                                    |
| XM1GC        | All     | Endogenous depression - recurrent                                                      |
| E1130        | All     | Recurrent major depressive episodes, unspecified                                       |
| E1131        | All     | Recurrent major depressive episodes, mild                                              |
| E1132        | All     | Recurrent major depressive episodes, moderate                                          |
| E1133        | All     | Recurrent major depressive episodes, severe, without mention of                        |

|       |     |                                                                                     |
|-------|-----|-------------------------------------------------------------------------------------|
|       |     | psychosis                                                                           |
| E1134 | All | Recurrent major depressive episodes, severe, with psychosis                         |
| XaX54 | All | Recurrent major depressive episodes, severe, with psychosis, psychosis in remission |
| E1135 | All | Recurrent major depressive episodes, in partial or unspecified remission            |
| E1136 | All | Recurrent major depressive episodes, in full remission                              |
| E113z | All | Recurrent major depressive episode NOS                                              |
| E1137 | All | Recurrent depression                                                                |
| E2B1. | All | Chronic depression                                                                  |
| Eu331 | All | [X]Recurrent depressive disorder, current episode moderate                          |
| XE1Y1 | All | Recurrent major depressive episodes                                                 |
| XE1Zd | All | [X]Recurrent depressive disorder, current episode severe without psychotic symptoms |
| XE1Ze | All | [X]Recurrent depressive disorder, current episode severe with psychotic symptoms    |
| XE1Zf | All | [X]Recurrent depressive disorder, unspecified                                       |

**Table S2.5 Read codes used to identify non-medication based treatments for depression or anxiety.** These codes are used as part of the validated case definition (see table S2.1).

| Counselling  |         |                                            |
|--------------|---------|--------------------------------------------|
| Read V2 Code | Term ID | Description                                |
| 67...        | 11      | Counselling/health education               |
| 671..        | All     | Counselling - general                      |
| 6712.        | All     | Counselling offered                        |
| 6714.        | All     | Counselling carried out                    |
| 6715.        | All     | Counselling by other agency                |
| 6716.        | All     | Counselling of benefit                     |
| 6717.        | All     | Counselling of no benefit                  |
| 671Z.        | All     | Counselling - general NOS                  |
| 672..        | All     | Person counselled                          |
| 6721.        | All     | Patient counselled                         |
| 6722.        | All     | Family counselled                          |
| 673..        | All     | Person counselled by                       |
| 6731.        | All     | Counselled by a doctor                     |
| 6732.        | All     | Counselled by a nurse                      |
| 6733.        | All     | Counselled by a health visitor             |
| 6735.        | All     | Counselled by a social worker              |
| 6736.        | All     | Counselled by a counsellor                 |
| 6737.        | All     | Counselled by a vol. worker                |
| 673Z.        | All     | Counselled by person NOS                   |
| 8M8..        | All     | Counselling requested                      |
| 9NJ1.        | All     | In-house counselling                       |
| 9NJR.        | All     | In-house counselling first appointment     |
| 9NJT.        | All     | In-house counselling follow-up appointment |
| Read Code    | CTV3    | Term ID                                    |
|              |         | Description                                |
| X71Ec        |         | All                                        |
| X71Ep        |         | All                                        |
| XaEC1        |         | All                                        |

|                                      |                |                                                         |
|--------------------------------------|----------------|---------------------------------------------------------|
| XaD27                                | All            | Family counselling                                      |
| 6779.                                | All            | Psychological counselling                               |
| XaECG                                | All            | Anxiety counselling                                     |
| XaECF                                | All            | Self-esteem counselling                                 |
| XaI8j                                | All            | Stress counselling                                      |
| 672..                                | All            | Person counselled                                       |
| 6721.                                | All            | Patient counselled                                      |
| 6722.                                | All            | Family counselled                                       |
| XE1Ti                                | All            | Person counselled by                                    |
| 6715.                                | All            | Counselling by other agency                             |
| 6731.                                | All            | Counselled by a doctor                                  |
| 6732.                                | All            | Counselled by a nurse                                   |
| 6733.                                | All            | Counselled by a health visitor                          |
| 6735.                                | All            | Counselled by a social worker                           |
| 6736.                                | All            | Counselled by a counsellor                              |
| 6737.                                | All            | Counselled by voluntary worker                          |
| 673Z.                                | All            | Counselled by person NOS                                |
| Xa07L                                | All            | Counselled by member of primary health care team        |
| 9N2B.                                | All            | Seen by counsellor                                      |
| XaAS4                                | All            | Seen by mental health counsellor                        |
| XaBT1                                | All            | Refer to counsellor                                     |
| XaAfj                                | All            | Referral to mental health counsellor                    |
| 9NJ1.                                | All            | In-house counselling                                    |
| XaLnp                                | All            | In-house counselling first appointment                  |
| XaLnr                                | All            | In-house counselling follow-up appointment              |
| 671..                                | All            | Counselling - general                                   |
| 6712.                                | All            | Counselling offered                                     |
| 6714.                                | All            | Counselling carried out                                 |
| 6716.                                | All            | Counselling of benefit                                  |
| 6717.                                | All            | Counselling of no benefit                               |
| 671Z.                                | All            | Counselling - general NOS                               |
| XaAOd                                | All            | Under care of counsellor                                |
| XaAOh                                | All            | Under care of mental health counsellor                  |
| <b>Cognitive Behavioural Therapy</b> |                |                                                         |
| <b>Read V2 Code</b>                  | <b>Term ID</b> | <b>Description</b>                                      |
| 8G13.                                | All            | Cognitive-behaviour therapy                             |
| 8G130                                | All            | Cognitive behavioural therapy parenting programme       |
| 8G131                                | All            | CBTp - cognitive behavioural therapy for psychosis      |
| 7L1a.                                | All            | Cognitive behavioural therapy                           |
| 7L1a0                                | All            | Cognitive behavioural therapy by unidisciplinary team   |
| 7L1a1                                | All            | Cognitive behavioural therapy by multidisciplinary team |
| 7L1ay                                | All            | Other specified cognitive behavioural therapy           |
| 7L1az                                | All            | Cognitive behavioural therapy NOS                       |
| 8G510                                | All            | Group cognitive behavioural therapy                     |

|                      |                |                                                                   |
|----------------------|----------------|-------------------------------------------------------------------|
| 8G15.                | All            | Computerised cognitive behavioural therapy                        |
| 8HIK.                | All            | Referral for cognitive behavioural therapy                        |
| <b>Read Code</b>     | <b>CTV3</b>    | <b>Term ID</b>                                                    |
| Ub0qp                | All            | Cognitive and behavioural therapy                                 |
| XaABO                | All            | Cognitive - behaviour therapy                                     |
| Xad6J                | All            | Cognitive behavioural therapy for psychosis                       |
| Xaaa6                | All            | Cognitive behavioural therapy parenting programme                 |
| XaQC0                | All            | Guided self help cognitive behavioural therapy                    |
| XaKzQ                | All            | Computerised cognitive behavioural therapy                        |
| Xa8I9                | All            | Generic cognitive behavioural therapy                             |
| XaM2I                | All            | Cognitive behavioural therapy by unidisciplinary team             |
| XaM2J                | All            | Cognitive behavioural therapy by multidisciplinary team           |
| XaM2K                | All            | Other specified cognitive behavioural therapy                     |
| XaM2L                | All            | Cognitive behavioural therapy NOS                                 |
| XaR2j                | All            | Referral to cognitive behavioural therapist                       |
| XaR5D                | All            | Referral for cognitive behavioural therapy                        |
| XaYgB                | All            | Referral for high intensity cognitive behavioural therapy         |
| <b>Psychotherapy</b> |                |                                                                   |
| <b>Read V2 Code</b>  | <b>Term ID</b> | <b>Description</b>                                                |
| 8G...                | All            | Psychotherapy                                                     |
| 8G1..                | All            | General psychotherapy                                             |
| 8G10.                | All            | Psychotherapy - behavioural                                       |
| 8G100                | All            | Behavioural activation therapy                                    |
| 8G101                | All            | Dialectical behaviour therapy                                     |
| 8G102                | All            | Behavioural parent training                                       |
| 8G11.                | All            | Psychotherapy - cognitive                                         |
| 8G12.                | All            | Psychotherapy - psychodynamic                                     |
| 8G120                | All            | Short-term psychodynamic therapy                                  |
| 8G121                | All            | Dynamic interpersonal therapy                                     |
| 8G122                | All            | Focal psychodynamic therapy                                       |
| 8G14.                | All            | Cognitive analytic therapy                                        |
| 8G15.                | All            | Computerised cognitive behavioural therapy                        |
| 8G16.                | All            | Interpersonal psychotherapy                                       |
| 8G18.                | All            | Cognitive stimulation therapy                                     |
| 9NIK.                | All            | Seen by psychotherapist                                           |
| 9NIK0                | All            | Seen by trainee psychotherapist                                   |
| 8HHT.                | All            | Referral to psychotherapist                                       |
| ZV57D                | All            | [V]Psychotherapy, not elsewhere classified                        |
| ZV673                | All            | [V]Psychotherapy or other treatment for mental disorder follow-up |
| 8G9Z.                | All            | Other psychotherapy NOS                                           |
| 8G9..                | All            | Other psychotherapy                                               |
| <b>Read Code</b>     | <b>CTV3</b>    | <b>Term ID</b>                                                    |
| X71bp                | All            | Psychotherapy                                                     |

|       |     |                                                   |
|-------|-----|---------------------------------------------------|
| XaaUO | All | Cognitive rehabilitation therapy                  |
| Xaltc | All | Brief solution focused psychotherapy              |
| Xa8IG | All | Psychoanalytic and psychodynamic therapy          |
| Xa8IJ | All | Long-term exploratory psychotherapy               |
| 3841. | All | Psychoanalysis                                    |
| XaA8V | All | Generic psychoanalysis                            |
| XaA8W | All | Independent psychoanalysis                        |
| XaA8T | All | Kleinian psychoanalysis                           |
| XaA8U | All | Bion-based group psychoanalysis                   |
| XaA8X | All | Classical psychoanalysis                          |
| XaA8Y | All | Lacanian psychoanalysis                           |
| XaA8g | All | Group psychoanalysis                              |
| XaA8U | All | Bion-based group psychoanalysis                   |
| 384Z. | All | Psychological analysis NOS                        |
| Xa8IM | All | Jungian-based therapy                             |
| Xa8IN | All | Generic Jungian-based therapy                     |
| Xa8IP | All | Analytical psychology                             |
| Xa8IR | All | Long-term psychodynamic psychotherapy             |
| XaA8Z | All | Developmental psychodynamic psychotherapy         |
| XaA8c | All | Supportive expressive psychodynamic psychotherapy |
| XaA8d | All | Psychodynamic-interpersonal psychotherapy         |
| XaEVq | All | Psychodynamic psychotherapy                       |
| Xad7C | All | Focal psychodynamic therapy                       |
| Xa8IR | All | Long-term psychodynamic psychotherapy             |
| XaA8Z | All | Developmental psychodynamic psychotherapy         |
| XaA8c | All | Supportive expressive psychodynamic psychotherapy |
| XaA8d | All | Psychodynamic-interpersonal psychotherapy         |
| Xa8II | All | Short-term psychodynamic therapy                  |
| XaXuc | All | Dynamic interpersonal therapy                     |
| XaA9g | All | Specific task orientated psychotherapy            |
| XE0iL | All | Psychotherapy/sociotherapy                        |
| 8G9Z. | All | Other psychotherapy NOS                           |
| 8G9.. | All | Other psychotherapy                               |
